# Supplementary material
Source: MDPI journal article supplement (https://www.mdpi.com/2073-4395/12/11/2675)
Supplement: s1 [file s1 › agronomy-1965176-supplementary.pdf]

*Supplementary materials for*

## **Establish the HPLC-MS/MS method for monitoring the residue, degradation of butralin under field and risk assessment**

Xiumei Wang<sup>1</sup>, Qinghang You<sup>1</sup>, Zhiguang Hou<sup>1\*</sup>, Xiaolong Yu<sup>1</sup>, Hemin Gao<sup>1</sup>, Yuxue Gao<sup>2</sup>, Liran Wang<sup>1</sup>, Liping Wei<sup>1</sup>, and Zhongbin Lu<sup>1</sup>

<sup>1</sup> College of Plant Protection, Jilin Agricultural University, Changchun 130118, China

<sup>2</sup> Jilin Provincial Agro-tech Central Extension Station, Changchun 130033, China

\* Correspondence: zhiguangh@jlau.edu.cn; Tel.: +86-0431-84510942

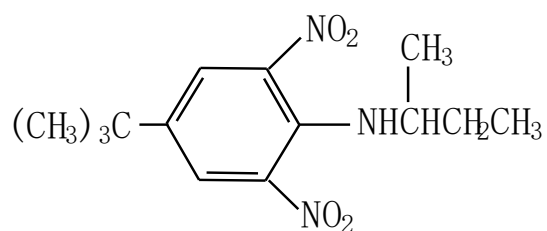

**Figure S1.** Chemical structure of butralin.

**Table S1.** The MRM for analysis of butralin.

| Compound | Ion source | Retention time | Precursor ion | Quantification ion (CE <sup>a</sup> ) | Confirmation ion (CE <sup>a</sup> ) | Fragmentor |
|----------|------------|----------------|---------------|---------------------------------------|-------------------------------------|------------|
| Butralin | ESI+       | 5.84           | 296.2         | 240.2(12)                             | 222.2 (23)                          | 70         |

<sup>a</sup> collision energy (eV) is given in parentheses.

**Table S2.** The parameters for the ESI source in HPLC-MS/MS.

| Parameters                                  | Positive mode |
|---------------------------------------------|---------------|
| Nebulizer pressure (psi)                    | 30            |
| Capillary voltage (kV)                      | 4.0           |
| Nozzle voltage (kV)                         | 0.5           |
| Desolvation flow rates <sup>a</sup> (L/min) | 7             |
| Sheath gas flow rates (L/min)               | 8             |
| Desolvation temperature (°C)                | 300           |
| Source temperature (°C)                     | 300           |

<sup>a</sup> Desolvation (L/min) is the drying gas.

**Table S3.** Linear equation and matrix effect of butralin in different ginseng matrices.

| Pesticide | Matrix        | Linear equation<br>(y)      | Correlation<br>coefficient<br>(r) | p-Value | Matrix effect |
|-----------|---------------|-----------------------------|-----------------------------------|---------|---------------|
| Butralin  | Acetonitrile  | $1.5 \times 10^7x - 51992$  | 0.9996                            | <0.0001 | -             |
|           | Ginseng       | $3.6 \times 10^7x - 164731$ | 0.9986                            | <0.0001 | 2.4           |
|           | Dried ginseng | $4.4 \times 10^7x - 26594$  | 0.9997                            | <0.0001 | 2.9           |
|           | Ginseng plant | $5.0 \times 10^7x - 484887$ | 0.9979                            | <0.0001 | 3.3           |
|           | Ginseng soil  | $4.9 \times 10^7x - 332568$ | 0.9993                            | <0.0001 | 2.2           |

**Table S4.** Recovery and RSD (n=5) of butralin in ginseng.

| Matrix        | Spiked level(mg/kg) | Mean Recovery (%) | RSD (%) |
|---------------|---------------------|-------------------|---------|
| Ginseng       | 0.01                | 107.5             | 1.4     |
|               | 0.05                | 105.2             | 2.3     |
|               | 0.5                 | 97.6              | 1.6     |
| Dried ginseng | 0.01                | 93.1              | 6.4     |
|               | 0.05                | 97.3              | 1.1     |
|               | 0.5                 | 97.5              | 0.7     |
| Ginseng plant | 0.01                | 97.9              | 2.5     |
|               | 0.05                | 105.9             | 1.4     |
|               | 0.5                 | 94.1              | 1.2     |
|               | 10.0                | 98.3              | 1.5     |
| Ginseng soil  | 0.01                | 103               | 0.8     |
|               | 0.05                | 99.7              | 5.6     |
|               | 0.5                 | 106.9             | 2.2     |
|               | 10.0                | 95.2              | 1.1     |

**Table S5.** The long-term dietary intake risk assessment of butralin based on the Chinese dietary pattern.

| Food category                                 | FI     | Commodity   | MRLs <sup>b</sup> | STMR <sup>b</sup> | Source of reference limit |
|-----------------------------------------------|--------|-------------|-------------------|-------------------|---------------------------|
| Rice cereals and rice products                | 0.2399 | Rice        | 0.05              |                   | China                     |
| Wheat cereals and wheat products              | 0.1385 |             |                   |                   |                           |
| Other cereal grains                           | 0.0233 |             |                   |                   |                           |
| Potatos                                       | 0.0495 | Beans (dry) | 0.02              |                   | China                     |
| Dried beans and their products                | 0.016  |             |                   |                   |                           |
| Dark-colored vegetables                       | 0.0915 |             |                   |                   |                           |
| Light-colored vegetables                      | 0.1837 |             |                   |                   |                           |
| Pickles                                       | 0.0103 | Tomatoes    | 0.01              |                   | EU                        |
| Fruits                                        | 0.0457 |             |                   |                   |                           |
| Nuts                                          | 0.0039 |             |                   |                   |                           |
| Livestocks and poultries                      | 0.0795 |             |                   |                   |                           |
| Milk and milk products                        | 0.0263 | Eggplant    |                   |                   |                           |
| Egg and egg products                          | 0.0236 |             |                   |                   |                           |
| Fish and fishproducts                         | 0.0301 |             |                   |                   |                           |
| Oilseeds and oil                              | 0.0327 |             |                   |                   |                           |
| Animal origin oil and fat                     | 0.0087 | Cotton seed | 0.05              |                   | China                     |
| Sugars and starch                             | 0.0044 |             |                   |                   |                           |
| Salt                                          | 0.012  |             |                   |                   |                           |
| Soy sauce                                     | 0.009  |             |                   |                   |                           |
|                                               | 1.0286 | Ginseng     |                   | 0.013             |                           |
| Total FI (kg day <sup>-1</sup> ) <sup>a</sup> |        |             |                   |                   |                           |
| Total NEDI (mg)                               | 0.0251 |             |                   |                   |                           |
| ADI (mg/kg bw)                                | 0.2    |             |                   |                   |                           |
| Body weight (kg bw)                           | 63     |             |                   |                   |                           |
| %ADI (%)                                      | 0.2%   |             |                   |                   |                           |

<sup>a</sup> The consumption values of ginseng and other crops referred to the recommended dietary food intake (FI) of an adult (63 kg) per day for its corresponding food classification (data from the dietary guideline published by Health Ministry of the People's Republic of China).

<sup>b</sup> The supervised trials median residue (STMR) in ginseng and the maximum residue limits (MRLs) in other crops were used to calculate the national estimated daily intake (NEDI). The high residue (HR) in ginseng was used to calculate the national estimated short-term intake (NESTI).
